# Supplementary material
Source: HighWire-hosted journal article supplement (https://www.cmajopen.ca/highwire/filestream/89624/field_highwire_adjunct_files/0/open-2021-0335-1-at.pdf)
Supplement: open-2021-0335-1-at.pdf [file open-2021-0335-1-at.pdf]

# Supplementary materials

## Study design

### Inclusion criteria differences between each strategy

|                                   | 2021 USPSTF                                                                                  | CTFPHC                                                                                       | Quebec Pilot (55-74yrs)     | Quebec Pilot 50-74yrs       | PLCO ≥1.51% | PLCO ≥1.7% | PLCO ≥2% |
|-----------------------------------|----------------------------------------------------------------------------------------------|----------------------------------------------------------------------------------------------|-----------------------------|-----------------------------|-------------|------------|----------|
| <b>PLCO threshold</b>             | -                                                                                            | -                                                                                            | ≥2%                         | ≥2%                         | ≥1.51%      | ≥1.7%      | ≥2%      |
| <b>Age inclusion</b>              | 50-80                                                                                        | 55-74                                                                                        | 55-74                       | 50-74                       | -           | -          | -        |
| <b>Smoking inclusion criteria</b> | - Smokers or smoking quit-time less than 15 years<br>- At least 20 pack-year smoking history | - Smokers or smoking quit-time less than 15 years<br>- At least 30 pack-year smoking history | - Smokers or former smokers | - Smokers or former smokers | -           | -          | -        |

## Statistical analysis

For the PLCOm2012 logistic model, the individual 6-year absolute risk of lung cancer is estimated as:

$$p_i = \frac{\exp\left(\alpha + \sum_{j=1}^{n_j} \beta_{ij} X_{ij}\right)}{1 + \exp\left(\alpha + \sum_{j=1}^{n_j} \beta_{ij} X_{ij}\right)}$$

where  $\alpha$  is a baseline coefficient,  $\beta_j$  is the coefficient associated with the  $j^{\text{th}}$  risk factor ( $X_j$ ) and  $X_{ij}$  is its value for individual  $i$ . Here,  $n_j$  is the number of variables included in the PLCOm2012 model. These coefficients and variable can be found in the Tammemägi *et al.* original article [1–3].

1. Tammemägi MC, Katki HA, Hocking WG, Church TR, Caporaso N, Kvale PA, et al. Selection Criteria for Lung-Cancer Screening. *N Engl J Med.* 2013 Feb 21;368(8):728–36.
2. Lung Cancer Risk Calculators [Internet]. Brock University. [cited 2021 Dec 10]. Available from: <https://brocku.ca/lung-cancer-screening-and-risk-prediction/risk-calculators/>
3. Tammemägi MC, Church TR, Hocking WG, Silvestri GA, Kvale PA, Riley TL, et al. Evaluation of the Lung Cancer Risks at Which to Screen Ever- and Never-Smokers: Screening Rules Applied to the PLCO and NLST Cohorts. *PLOS Medicine.* 2014 Dec 2;11(12):e1001764.

**Figure 1.** Comparison of the shift and serial screening scenarios for a theoretical participant. Note: LDCT = low-dose computed tomography. Percentages are the calculated PLCOm2012 risk. In this example, we considered a threshold of 2.00% for being screened. For the shift scenario, the PLCOm2012 risk is calculated each year. The participant has a risk higher than 2.00% during the year 1 and 2, leading to an LDCT scan each year until year 7. Risk remains less than 2.00% until the year 9; therefore, the participant had no LDCT during year 8. The risk was higher than 2.00% at year 9 and 10, leading to an LDCT scan each year until year 15. For the serial scenario, the PLCOm2012 risk score is calculated every 6 years. The participant had a risk score higher than 2.00% during the year 1; therefore, the participant had an LDCT scan each year until year 7. The risk score was calculated at year 8, with a score lower than 2.00%; therefore, the participant did not have an LDCT scan during the next 6 years. For the Quebec pilot model, these scenarios were the same, but no LDCT was done if the participant was outside the age range.

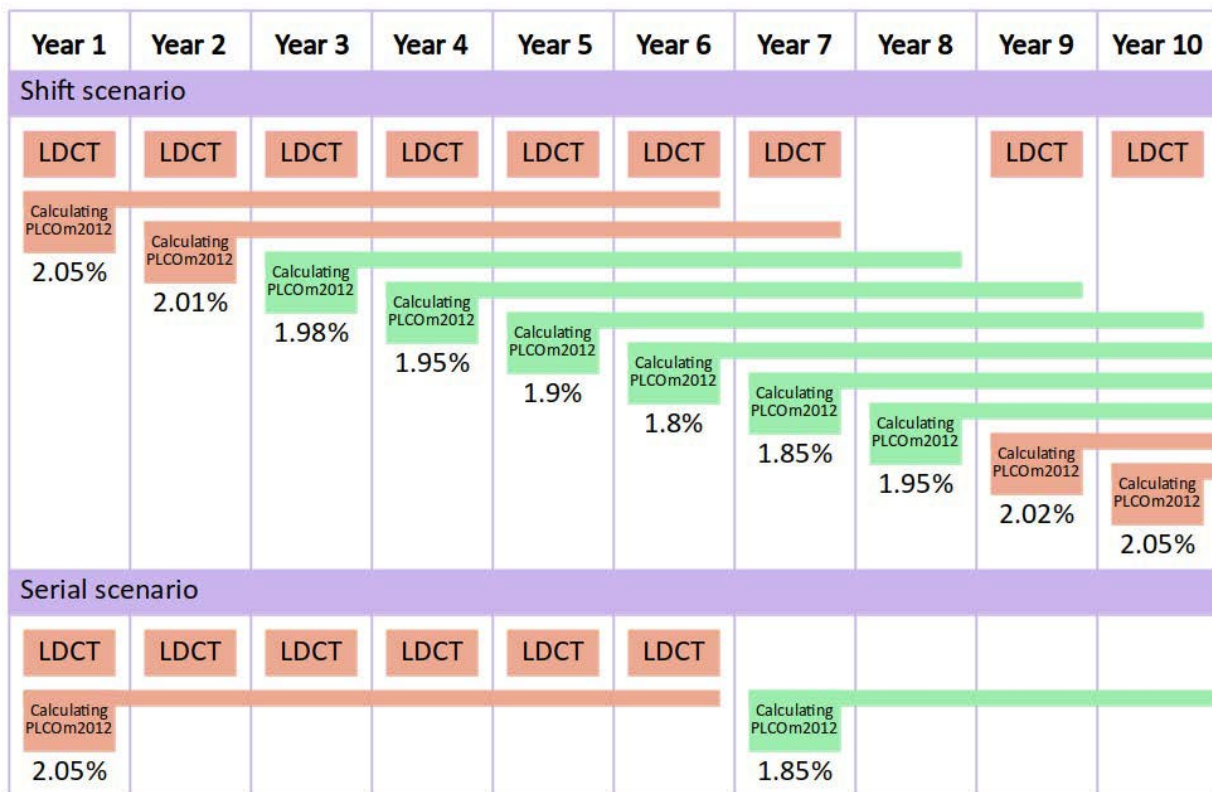

## Supplementary results

**Table S1. Comparison of different computed tomography lung cancer screening inclusion criteria with a serial scenario, between 1998 and 2015 (n=8938)**

|                                                                  | Quebec Pilot (55-74yrs)<br>+ PLCO $\geq$ 2% | Quebec Pilot (50-74yrs)<br>+ PLCO $\geq$ 2% | PLCO $\geq$ 1.51%<br>(no age criteria) | PLCO $\geq$ 1.7%<br>(no age criteria) | PLCO $\geq$ 2%<br>(no age criteria) |
|------------------------------------------------------------------|---------------------------------------------|---------------------------------------------|----------------------------------------|---------------------------------------|-------------------------------------|
| <b>Total number of participants eligible to be screened*</b>     | 1552 (17.4%)                                | 1554 (17.4%)                                | 2013 (22.5%)                           | 1734 (19.4%)                          | 1408 (15.8%)                        |
| <b>Total number of LDCTs</b>                                     | 11286                                       | 11661                                       | 18352                                  | 15284                                 | 11474                               |
| <b>Number of lung cancers detected</b>                           | 78 (38%)                                    | 76 (37.1%)                                  | 98 (47.8%)                             | 93 (45.4%)                            | 81 (39.5%)                          |
| <b>Number of LDCT for one cancer detected</b>                    | 144.7                                       | 153.4                                       | 187.3                                  | 164.3                                 | 141.7                               |
| <b>Number of participants screened to detect one lung cancer</b> | 19.9                                        | 20.4                                        | 20.5                                   | 18.6                                  | 16.8                                |
| <b>Number of LDCT before cancer detection per participant</b>    | 7.4                                         | 7.7                                         | 8.7                                    | 8.3                                   | 7.0                                 |
| <b>Number of LDCT per cancer-free participants*</b>              | 7.3                                         | 7.5                                         | 9.1                                    | 8.8                                   | 8.2                                 |
| <b>Sensitivity</b>                                               | 38% [31.4-45.1]                             | 37.1% [30.4-44.1]                           | 47.8% [40.8-54.9]                      | 45.4% [38.4-52.4]                     | 39.5% [32.8-46.6]                   |
| <b>Specificity</b>                                               | 92.6% [92.5-92.7]                           | 92.4% [92.2-92.5]                           | 88.0% [87.8-88.1]                      | 90.0% [89.8-90.1]                     | 92.5% [92.4-92.6]                   |
| <b>Positive predictive value</b>                                 | 5.0% [4.0-6.2]                              | 4.9% [3.9-6.1]                              | 4.9% [4-5.9]                           | 5.4% [4.4-6.5]                        | 6.0% [4.8-7.3]                      |

LDCT: low-dose computed tomography; USPSTF: US Preventive Services Task Force

Serial scenario: we checked eligibility each 6 years. If a participant met the inclusion criteria, he/she had a LDCT per year during 6 years. Otherwise, no LDCT was made until the next screening.

\* only participants with at least one LDCT
